# Supplementary material
Source: PubMed Central journal article supplement (PMC206458)
Supplement: nar_31_19_5732__1.pdf [file nar_31_19_5732__1.pdf]

# The DNA and RNA specificity of eilatin Ru(II) complexes as compared to eilatin and ethidium bromide.

Nathan W. Luedtke, Judy S. Hwang, Eileen Nava, Dalia Gut, Moshe Kol, and Yitzhak Tor

## Supporting Information: Changes in the UV-vis Absorbance Spectra of Eilatin-Containing Metal Complexes Upon Titration of Polymeric Nucleic Acids.

$\Delta$ -[Ru(bpy)<sub>2</sub>Eilatin]<sup>2+</sup> / poly r[A]-r[U]

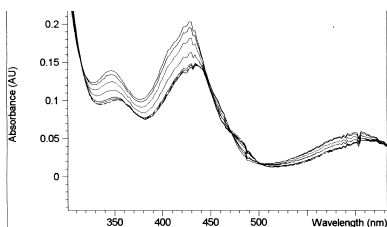

Sample/Result Table

| #  | Name                      | Abs<350nm> | Abs<420nm> | Abs<480nm> | Abs<560nm> |
|----|---------------------------|------------|------------|------------|------------|
| 1  | 8uM Lamb                  | 0.13795    | 0.19055    | 3.5355E-2  | 3.9261E-2  |
| 2  | 0.5uL, 4.4uM(AU) (4.4 μM) | 0.13329    | 0.18324    | 3.8986E-2  | 3.8177E-2  |
| 3  | 0.5uL (8.8uM)             | 0.12434    | 0.17073    | 4.1016E-2  | 3.5110E-2  |
| 4  | 0.5uL (13.2uM)            | 0.11772    | 0.16034    | 4.2953E-2  | 3.2288E-2  |
| 5  | 0.5uL (17.6uM)            | 0.11395    | 0.15294    | 4.5898E-2  | 3.1387E-2  |
| 6  | 1uL (26.4uM)              | 0.10808    | 0.14368    | 4.7668E-2  | 2.8885E-2  |
| 7  | 1uL (35.2uM)              | 0.10443    | 0.13953    | 4.8431E-2  | 2.7267E-2  |
| 8  | 1uL (44.0uM)              | 0.10214    | 0.13716    | 4.9042E-2  | 2.6672E-2  |
| 9  | 0.5uL, 15.16mM (59.16 μM) | 0.10071    | 0.13513    | 5.0339E-2  | 2.5940E-2  |
| 10 | 1uL (89.48uM)             | 0.10051    | 0.13501    | 5.1590E-2  | 2.5482E-2  |
| 11 | 2uL (150.12uM)            | 0.10095    | 0.13600    | 5.3070E-2  | 2.5833E-2  |

$\Delta$ -[Ru(bpy)<sub>2</sub>Eilatin]<sup>2+</sup> / poly r[A]-r[U]

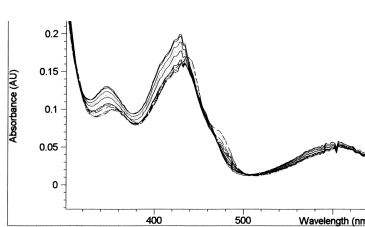

Sample/Result Table

| #  | Name                      | Abs<350nm> | Abs<420nm> | Abs<480nm> | Abs<560nm> |
|----|---------------------------|------------|------------|------------|------------|
| 1  | 8uM Delta                 | 0.12857    | 0.18607    | 3.0670E-2  | 3.6697E-2  |
| 2  | 0.5uL, 4.4uM(4.4 μM)      | 0.12755    | 0.18392    | 3.3325E-2  | 3.7354E-2  |
| 3  | 0.5uL (8.8uM)             | 0.12242    | 0.17693    | 3.4470E-2  | 3.5614E-2  |
| 4  | 0.5uL (13.2uM)            | 0.11911    | 0.17119    | 3.6102E-2  | 3.4637E-2  |
| 5  | 0.5uL (17.6uM)            | 0.11514    | 0.16556    | 3.7399E-2  | 3.3417E-2  |
| 6  | 1uL (26.4uM)              | 0.11142    | 0.15959    | 4.0146E-2  | 3.2608E-2  |
| 7  | 1uL (35.2uM)              | 0.10750    | 0.15401    | 4.1351E-2  | 3.1448E-2  |
| 8  | 1uL (44uM)                | 0.10598    | 0.15178    | 4.3411E-2  | 3.1281E-2  |
| 9  | 0.5uL, 15.16mM (59.16 μM) | 0.10339    | 0.14832    | 4.6204E-2  | 3.0441E-2  |
| 10 | 1uL (89.48uM)             | 9.9228E-2  | 0.14629    | 4.9255E-2  | 2.9068E-2  |
| 11 | 2uL (150.12uM)            | 9.6532E-2  | 0.14514    | 5.4443E-2  | 2.8107E-2  |
| 12 | 3uL (241.08uM)            | 9.8495E-2  | 0.14656    | 5.8685E-2  | 2.9694E-2  |

$\Delta$ -[Ru(bpy)<sub>2</sub>Eilatin]<sup>2+</sup> / poly r[G]-r[C]

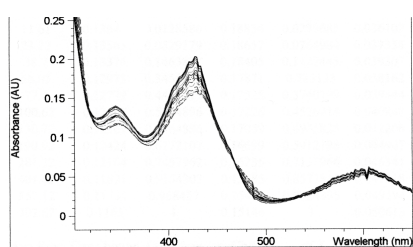

Sample/Result Table

| #  | Name                       | Abs<350nm> | Abs<420nm> | Abs<480nm> | Abs<560nm> |
|----|----------------------------|------------|------------|------------|------------|
| 1  | 8uM Lamb                   | 0.13672    | 0.18948    | 3.4103E-2  | 3.8483E-2  |
| 2  | 0.5uL, 3.87mMrGrC(3.87 μM) | 0.13799    | 0.19189    | 3.6987E-2  | 4.0726E-2  |
| 3  | 1uL (11.61uM)              | 0.13646    | 0.18834    | 3.6102E-2  | 3.9246E-2  |
| 4  | 1.5uL (23.22uM)            | 0.13565    | 0.18657    | 3.7354E-2  | 3.9291E-2  |
| 5  | 2uL (38.7uM)               | 0.13376    | 0.18405    | 3.9307E-2  | 4.0131E-2  |
| 6  | 2.5uL (58.05uM)            | 0.12973    | 0.17871    | 3.8162E-2  | 3.7262E-2  |
| 7  | 2.5uL (77.4uM)             | 0.12779    | 0.17525    | 3.9448E-2  | 3.7216E-2  |
| 8  | 3uL (100.62uM)             | 0.12567    | 0.17226    | 4.0848E-2  | 3.6789E-2  |
| 9  | 1uL, 15.05mM (130.72 μM)   | 0.12567    | 0.17059    | 4.2206E-2  | 3.6346E-2  |
| 10 | 2uL (190.92uM)             | 0.12424    | 0.16699    | 4.4907E-2  | 3.6530E-2  |
| 11 | 3uL (281.22uM)             | 0.12164    | 0.16235    | 4.6341E-2  | 3.5019E-2  |
| 12 | 4uL (401.62uM)             | 0.11821    | 0.15685    | 4.7318E-2  | 3.4088E-2  |
| 13 | 5uL (552.12uM)             | 0.11734    | 0.15401    | 4.9194E-2  | 3.4271E-2  |
| 14 | 5uL (702.62uM)             | 0.11650    | 0.15144    | 5.0613E-2  | 3.4470E-2  |

$\Delta$ -[Ru(bpy)<sub>2</sub>Eilatin]<sup>2+</sup> / poly r[G]-r[C]

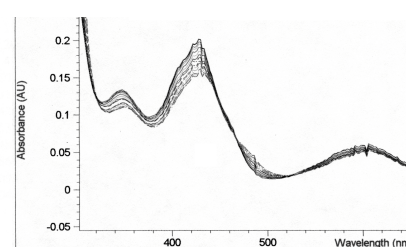

Sample/Result Table

| #  | Name                     | Abs<350nm> | Abs<420nm> | Abs<480nm> | Abs<560nm> |
|----|--------------------------|------------|------------|------------|------------|
| 1  | 8uM Delta                | 0.13107    | 0.18811    | 3.2364E-2  | 3.9246E-2  |
| 2  | 0.5uL, 3.87mMrGrC        | 0.13213    | 0.18858    | 3.4424E-2  | 3.9917E-2  |
| 3  | 1uL (11.61uM)            | 0.13046    | 0.18532    | 3.4210E-2  | 3.8284E-2  |
| 4  | 1uL (19.35uM)            | 0.12883    | 0.18279    | 3.4790E-2  | 3.7537E-2  |
| 5  | 2uL (34.83uM)            | 0.12695    | 0.17871    | 3.6530E-2  | 3.7094E-2  |
| 6  | 2.5uL (54.18uM)          | 0.12433    | 0.17418    | 3.8040E-2  | 3.6255E-2  |
| 7  | 2.5uL (73.53uM)          | 0.12196    | 0.17004    | 3.9505E-2  | 3.5553E-2  |
| 8  | 3uL (96.75uM)            | 0.12039    | 0.16652    | 4.1733E-2  | 3.5492E-2  |
| 9  | 1uL, 15.05mM (126.86 μM) | 0.11612    | 0.16159    | 4.2999E-2  | 3.4256E-2  |
| 10 | 1uL (156.95uM)           | 0.11497    | 0.15952    | 4.5151E-2  | 3.4729E-2  |
| 11 | 2uL (217.15uM)           | 0.11349    | 0.15569    | 4.7134E-2  | 3.3966E-2  |
| 12 | 3uL (307.45uM)           | 0.11159    | 0.15193    | 4.9133E-2  | 3.3539E-2  |
| 13 | 4uL (427.85uM)           | 0.11133    | 0.15004    | 5.1361E-2  | 3.3768E-2  |
| 14 | 4uL (548.25uM)           | 0.11092    | 0.14803    | 5.1804E-2  | 3.3096E-2  |

$\Delta$ -[Ru(bpy)<sub>2</sub>Eilatin]<sup>2+</sup> / poly d[AT]-d[AT]

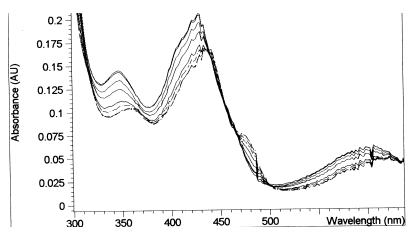

Sample/Result Table

| #  | Name                       | Abs<350nm> | Abs<420nm> | Abs<480nm> | Abs<560nm> |
|----|----------------------------|------------|------------|------------|------------|
| 1  | 8uM Lamb                   | 0.14348    | 0.19347    | 3.8025E-2  | 4.1351E-2  |
| 2  | 0.5ul,1.15mM dAT (1.15 μM) | 0.14159    | 0.19131    | 4.0924E-2  | 4.2130E-2  |
| 3  | 1ul (3.45uM)               | 0.13362    | 0.18326    | 4.1885E-2  | 3.9139E-2  |
| 4  | 1ul (5.75uM)               | 0.12782    | 0.17703    | 4.4266E-2  | 3.6819E-2  |
| 5  | 1ul (8.05uM)               | 0.12466    | 0.17267    | 4.7882E-2  | 3.5538E-2  |
| 6  | 1.5ul (11.5uM)             | 0.11801    | 0.16466    | 5.1514E-2  | 3.2318E-2  |
| 7  | 1.5ul (14.95uM)            | 0.11240    | 0.15804    | 5.5176E-2  | 2.9785E-2  |
| 8  | 0.5ul,4.58mM (19.53 μM)    | 0.10791    | 0.15201    | 6.0150E-2  | 2.7908E-2  |
| 9  | 1ul (28.69uM)              | 0.10249    | 0.14673    | 6.4178E-2  | 2.5681E-2  |
| 10 | 0.5ul,13.41mM (42.1 μM)    | 0.10263    | 0.14668    | 6.2125E-2  | 2.6215E-2  |
| 11 | 1ul (68.92uM)              | 0.10106    | 0.14510    | 6.8283E-2  | 2.5558E-2  |

$\Delta$ -[Ru(bpy)<sub>2</sub>Eilatin]<sup>2+</sup> / poly d[AT]-d[AT]

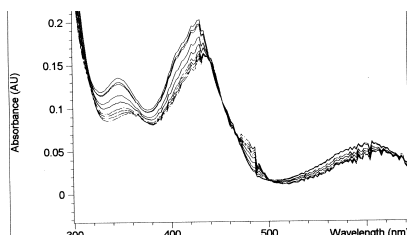

Sample/Result Table

| #  | Name                       | Abs<350nm> | Abs<420nm> | Abs<480nm> | Abs<560nm> |
|----|----------------------------|------------|------------|------------|------------|
| 1  | 8uM Delta                  | 0.13354    | 0.18959    | 3.2349E-2  | 3.8208E-2  |
| 2  | 0.5ul,1.15mM dAT (1.15 μM) | 0.12926    | 0.18463    | 3.4088E-2  | 3.7796E-2  |
| 3  | 0.5ul (2.3uM)              | 0.12714    | 0.18199    | 3.6926E-2  | 3.7888E-2  |
| 4  | 1ul (4.6uM)                | 0.12079    | 0.17482    | 3.8757E-2  | 3.4546E-2  |
| 5  | 1ul (6.9uM)                | 0.11563    | 0.16840    | 4.2328E-2  | 3.3615E-2  |
| 6  | 1ul (9.2uM)                | 0.11044    | 0.16295    | 4.4907E-2  | 3.1769E-2  |
| 7  | 1ul (11.5uM)               | 0.10777    | 0.15923    | 4.7666E-2  | 3.1006E-2  |
| 8  | 0.5ul,4.58mM (16.75 μM)    | 0.10068    | 0.15143    | 5.1239E-2  | 2.8641E-2  |
| 9  | 0.5ul (20.66uM)            | 9.7778E-2  | 0.14780    | 5.3574E-2  | 2.7466E-2  |
| 10 | 1ul (29.82uM)              | 9.4894E-2  | 0.14496    | 5.6534E-2  | 2.6657E-2  |
| 11 | 0.5ul,13.41mM (43.73 μM)   | 9.4193E-2  | 0.14418    | 5.9189E-2  | 2.6779E-2  |
| 12 | 1ul (70.05uM)              | 9.2072E-2  | 0.14235    | 6.0120E-2  | 2.6184E-2  |

$\Delta$ -[Ru(bpy)<sub>2</sub>Eilatin]<sup>2+</sup> / poly d[GC]-d[GC]

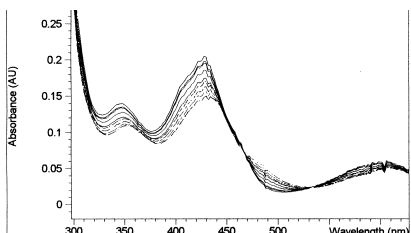

Sample/Result Table

| #  | Name                     | Abs<350nm> | Abs<420nm> | Abs<490nm> | Abs<560nm> |
|----|--------------------------|------------|------------|------------|------------|
| 1  | 8uM Lamb                 | 0.13835    | 0.19209    | 2.2293E-2  | 4.0421E-2  |
| 2  | 1ul,1.61mM dGC (3.22 μM) | 0.13445    | 0.18607    | 2.4841E-2  | 3.9688E-2  |
| 3  | 0.5ul (4.83uM)           | 0.13332    | 0.18419    | 2.6016E-2  | 3.9612E-2  |
| 4  | 1ul (8.05uM)             | 0.13055    | 0.17972    | 2.8488E-2  | 3.8483E-2  |
| 5  | 1ul (11.27uM)            | 0.12741    | 0.17490    | 3.0640E-2  | 3.7582E-2  |
| 6  | 1ul (14.49uM)            | 0.12471    | 0.17027    | 3.2562E-2  | 3.6743E-2  |
| 7  | 1.5ul (19.32uM)          | 0.12125    | 0.16426    | 3.5110E-2  | 3.5721E-2  |
| 8  | 2ul (25.76uM)            | 0.11896    | 0.15930    | 3.8589E-2  | 3.5080E-2  |
| 9  | 0.5ul,9.51mM (35.3 μM)   | 0.11548    | 0.15298    | 4.1077E-2  | 3.3554E-2  |
| 10 | 1ul (54.29uM)            | 0.11179    | 0.14706    | 4.4235E-2  | 3.2791E-2  |
| 11 | 2ul (92.33uM)            | 0.10951    | 0.14264    | 4.5719E-2  | 3.1631E-2  |
| 12 | 4ul (168.41uM)           | 0.10921    | 0.14122    | 4.7821E-2  | 3.2669E-2  |
| 13 | 5ul (263.51uM)           | 0.10858    | 0.13878    | 4.7577E-2  | 3.1738E-2  |

$\Delta$ -[Ru(bpy)<sub>2</sub>Eilatin]<sup>2+</sup> / poly d[GC]-d[GC]

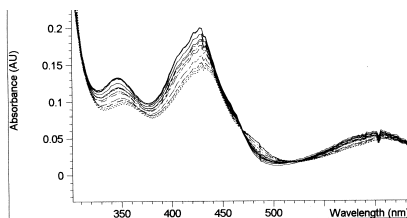

Sample/Result Table

| #  | Name                    | Abs<350nm> | Abs<420nm> | Abs<480nm> | Abs<560nm> |
|----|-------------------------|------------|------------|------------|------------|
| 1  | 8uM Delta               | 0.13054    | 0.18716    | 3.0365E-2  | 3.6453E-2  |
| 2  | 0.5ul,1.61mM dGC        | 0.13106    | 0.18837    | 3.3142E-2  | 3.8422E-2  |
| 3  | 1ul (4.83uM)            | 0.13213    | 0.18806    | 3.5263E-2  | 3.9856E-2  |
| 4  | 2ul (11.27uM)           | 0.12729    | 0.18257    | 3.4790E-2  | 3.7598E-2  |
| 5  | 2ul (17.71uM)           | 0.12483    | 0.17978    | 3.5400E-2  | 3.7048E-2  |
| 6  | 2ul (24.15uM)           | 0.12204    | 0.17615    | 3.5919E-2  | 3.6453E-2  |
| 7  | 0.5ul,9.51mM (33.66 μM) | 0.11923    | 0.17233    | 3.6942E-2  | 3.5141E-2  |
| 8  | 0.5ul (43.17uM)         | 0.11786    | 0.16980    | 3.8223E-2  | 3.5004E-2  |
| 9  | 1ul (62.19uM)           | 0.11421    | 0.16464    | 3.9627E-2  | 3.4241E-2  |
| 10 | 1.5ul (90.72uM)         | 0.11197    | 0.16042    | 4.2511E-2  | 3.3875E-2  |
| 11 | 2ul (128.76uM)          | 0.10916    | 0.15529    | 4.4067E-2  | 3.2639E-2  |
| 12 | 2ul (185.82uM)          | 0.10916    | 0.15529    | 4.4067E-2  | 3.2639E-2  |
| 13 | 5ul (280.92uM)          | 0.10547    | 0.14981    | 4.6097E-2  | 3.1586E-2  |
| 14 | 5ul (376.02uM)          | 0.10289    | 0.14436    | 4.6097E-2  | 3.0411E-2  |
| 15 | 6ul (490.14uM)          | 0.10196    | 0.14137    | 4.9698E-2  | 3.0548E-2  |
| 16 | 6ul (604.26uM)          | 9.9167E-2  | 0.13774    | 4.9194E-2  | 2.8793E-2  |
| 16 | 6ul (604.26uM)          | 9.6893E-2  | 0.13536    | 4.9530E-2  | 2.8595E-2  |

$\Delta$ -[Ru(bpy)<sub>2</sub>Eilatin]<sup>2+</sup> / poly d[G]-d[C]

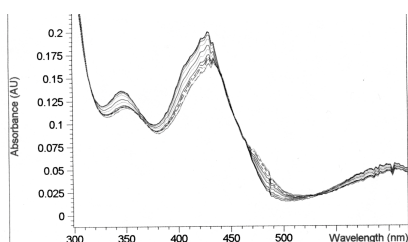

Sample/Result Table

| #  | Name                       | Abs<350nm> | Abs<420nm> | Abs<480nm> | Abs<560nm> |
|----|----------------------------|------------|------------|------------|------------|
| 1  | 8uM Lamb                   | 0.13451    | 0.18716    | 3.4088E-2  | 3.6896E-2  |
| 2  | 0.5ul,1.28mM dGC (1.28 μM) | 0.13448    | 0.18683    | 3.6011E-2  | 3.8071E-2  |
| 3  | 1ul (3.84uM)               | 0.13298    | 0.18434    | 3.8132E-2  | 3.7796E-2  |
| 4  | 1ul (6.4uM)                | 0.13046    | 0.18039    | 3.8849E-2  | 3.6392E-2  |
| 5  | 1.5ul,2.55mM (14.1uM)      | 0.12657    | 0.17351    | 4.3060E-2  | 3.5416E-2  |
| 6  | 1.5ul (21.7uM)             | 0.12396    | 0.16905    | 4.5456E-2  | 3.4363E-2  |
| 7  | 2ul (31.9uM)               | 0.12051    | 0.16307    | 4.8218E-2  | 3.2898E-2  |
| 8  | 2ul (42.1uM)               | 0.11893    | 0.15948    | 5.0888E-2  | 3.2532E-2  |
| 9  | 3ul,3.32mM (62.02uM)       | 0.11966    | 0.15692    | 5.5145E-2  | 3.2516E-2  |
| 10 | 3ul (95.22uM)              | 0.11760    | 0.15236    | 5.7327E-2  | 3.1570E-2  |
| 11 | 5ul (128.42uM)             | 0.11743    | 0.15134    | 5.9067E-2  | 3.1845E-2  |

$\Delta$ -[Ru(bpy)<sub>2</sub>Eilatin]<sup>2+</sup> / poly d[G]-d[C]

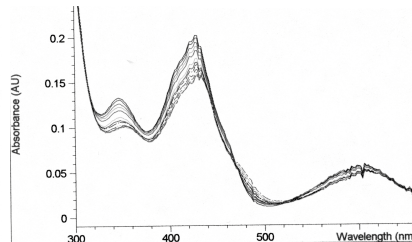

Sample/Result Table

| #  | Name                       | Abs<350nm> | Abs<420nm> | Abs<480nm> | Abs<560nm> |
|----|----------------------------|------------|------------|------------|------------|
| 1  | 8uM Delta                  | 0.13179    | 0.18927    | 3.0319E-2  | 3.6148E-2  |
| 2  | 0.5ul,1.28mM dGC (1.28 μM) | 0.12939    | 0.18674    | 3.2135E-2  | 3.7384E-2  |
| 3  | 1ul (3.84uM)               | 0.12489    | 0.18214    | 3.2791E-2  | 3.5919E-2  |
| 4  | 1ul (6.4uM)                | 0.12227    | 0.17763    | 3.4363E-2  | 3.5645E-2  |
| 5  | 1ul (9.6uM)                | 0.11880    | 0.17360    | 3.4744E-2  | 3.4317E-2  |
| 6  | 1ul (18.96uM)              | 0.11133    | 0.16501    | 3.4714E-2  | 3.1845E-2  |
| 7  | 1ul (19.16uM)              | 0.10764    | 0.16058    | 3.6301E-2  | 3.1082E-2  |
| 8  | 1.5ul (26.81uM)            | 0.10567    | 0.15768    | 3.8498E-2  | 3.1067E-2  |
| 9  | 2ul (37.01uM)              | 0.10243    | 0.15334    | 3.9932E-2  | 2.9939E-2  |
| 10 | 3ul,3.32mM (56.93 μM)      | 0.10132    | 0.15013    | 4.2892E-2  | 2.9541E-2  |
| 11 | 5ul (90.13uM)              | 0.10001    | 0.14717    | 4.5563E-2  | 2.9373E-2  |
| 12 | 5ul (123.33uM)             | 0.10089    | 0.14612    | 4.8599E-2  | 3.0167E-2  |

### $\Delta$ -[Ru(bpy)<sub>2</sub>Eilatin]<sup>2+</sup> / poly d[A]-d[T]

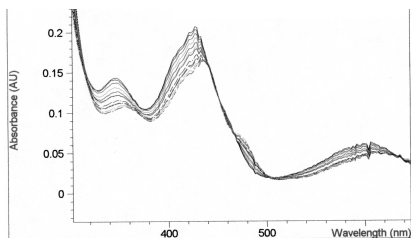

Sample/Result Table

| #  | Name                         | Abs<350nm> | Abs<420nm> | Abs<480nm> | Abs<560nm> |
|----|------------------------------|------------|------------|------------|------------|
| 1  | 8uM Lamb                     | 0.14163    | 0.19394    | 3.7643E-2  | 4.1748E-2  |
| 2  | 0.5uL, 1.49mM dAdT (1.49 μM) | 0.14021    | 0.19133    | 3.9108E-2  | 4.1489E-2  |
| 3  | 1uL (4.47uM)                 | 0.13649    | 0.18655    | 4.1351E-2  | 3.9568E-2  |
| 4  | 1uL (7.45uM)                 | 0.13092    | 0.18085    | 4.4250E-2  | 3.8798E-2  |
| 5  | 1uL (10.43uM)                | 0.12654    | 0.17555    | 4.6097E-2  | 3.6423E-2  |
| 6  | 1uL (13.47uM)                | 0.12254    | 0.17001    | 4.7836E-2  | 3.4988E-2  |
| 7  | 1uL (16.39uM)                | 0.12202    | 0.16756    | 5.1117E-2  | 3.4927E-2  |
| 8  | 2uL (22.35uM)                | 0.11533    | 0.16006    | 5.2536E-2  | 3.1403E-2  |
| 9  | 2uL (28.31uM)                | 0.11243    | 0.15511    | 5.4764E-2  | 2.9892E-2  |
| 10 | 2uL (34.27uM)                | 0.11247    | 0.15407    | 5.8044E-2  | 3.1143E-2  |
| 11 | 1uL, 4.24mM (42.75 μM)       | 0.10821    | 0.14929    | 5.8992E-2  | 2.9144E-2  |
| 12 | 2uL (59.71uM)                | 0.10582    | 0.14668    | 6.0196E-2  | 2.8656E-2  |
| 13 | 4uL (93.63uM)                | 0.10606    | 0.14619    | 6.2027E-2  | 2.9480E-2  |

### $\Delta$ -[Ru(bpy)<sub>2</sub>Eilatin]<sup>2+</sup> / poly d[A]-d[T]

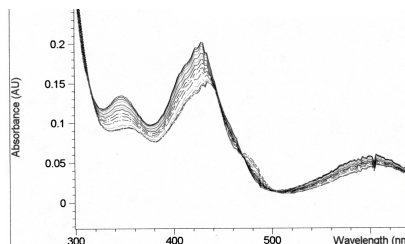

Sample/Result Table

| #  | Name                         | Abs<350nm> | Abs<420nm> | Abs<480nm> | Abs<560nm> |
|----|------------------------------|------------|------------|------------|------------|
| 1  | 8uM Delta                    | 0.13306    | 0.18858    | 3.1693E-2  | 3.7689E-2  |
| 2  | 0.5uL, 1.49mM dAdT (1.49 μM) | 0.13150    | 0.18742    | 3.3905E-2  | 3.9169E-2  |
| 3  | 1uL (4.47uM)                 | 0.12907    | 0.18445    | 3.5202E-2  | 3.8300E-2  |
| 4  | 1uL (7.45uM)                 | 0.12689    | 0.18088    | 3.5706E-2  | 3.6682E-2  |
| 5  | 1uL (10.43uM)                | 0.12265    | 0.17648    | 3.5980E-2  | 3.4882E-2  |
| 6  | 1uL (13.41uM)                | 0.11967    | 0.17168    | 3.6957E-2  | 3.3936E-2  |
| 7  | 1uL (16.39uM)                | 0.11613    | 0.16826    | 3.7888E-2  | 3.3081E-2  |
| 8  | 1.5uL (20.86uM)              | 0.11206    | 0.16307    | 3.8818E-2  | 3.1708E-2  |
| 9  | 2uL (26.82uM)                | 0.10841    | 0.15796    | 4.1153E-2  | 3.0533E-2  |
| 10 | 3uL (35.76uM)                | 0.10423    | 0.15190    | 4.3625E-2  | 2.9205E-2  |
| 11 | 1.5uL, 4.24mM (48.48 μM)     | 0.10433    | 0.14313    | 4.7195E-2  | 2.7069E-2  |
| 12 | 1.5uL (61.2uM)               | 9.4086E-2  | 0.13802    | 4.9530E-2  | 2.6154E-2  |
| 13 | 2uL (78.16uM)                | 9.3658E-2  | 0.13641    | 5.1361E-2  | 2.5864E-2  |
| 14 | 4uL (112.08uM)               | 9.3155E-2  | 0.13530    | 5.3406E-2  | 2.6245E-2  |

### $\Delta$ -[Ru(bpy)<sub>2</sub>Eilatin]<sup>2+</sup> / poly r[l]-r[C]

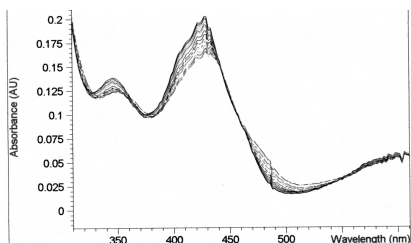

Sample/Result Table

| #  | Name                     | Abs<350nm> | Abs<420nm> | Abs<480nm> | Abs<560nm> |
|----|--------------------------|------------|------------|------------|------------|
| 1  | 8uM Lamb                 | 0.13696    | 0.19043    | 3.5110E-2  | 3.9551E-2  |
| 2  | 2uL, 2mM MIC (8uM)       | 0.13542    | 0.18893    | 3.5950E-2  | 3.9917E-2  |
| 3  | 3uL (20uM)               | 0.13518    | 0.18776    | 3.7094E-2  | 4.0298E-2  |
| 4  | 2.5uL, 3.95mM (39.75 μM) | 0.13300    | 0.18513    | 3.8071E-2  | 3.9659E-2  |
| 5  | 3uL (63.45uM)            | 0.13239    | 0.18237    | 3.9032E-2  | 3.9062E-2  |
| 6  | 1uL, 14.93mM (93.31 μM)  | 0.13135    | 0.18073    | 4.0619E-2  | 3.9398E-2  |
| 7  | 2uL (153.03uM)           | 0.12849    | 0.17642    | 4.1260E-2  | 3.8177E-2  |
| 8  | 3uL (242.61uM)           | 0.12703    | 0.17249    | 4.3304E-2  | 3.7762E-2  |
| 9  | 4uL (362.05uM)           | 0.12617    | 0.16962    | 4.6539E-2  | 3.7628E-2  |
| 10 | 6uL (541.21uM)           | 0.12605    | 0.16609    | 5.0201E-2  | 3.7720E-2  |
| 11 | 7uL (750.23uM)           | 0.12343    | 0.16148    | 5.2612E-2  | 3.7567E-2  |
| 12 | 7uL (959.25uM)           | 0.12236    | 0.15921    | 5.5038E-2  | 3.7064E-2  |
| 13 | 8uL (1198.13uM)          | 0.12498    | 0.15828    | 5.8411E-2  | 3.8910E-2  |
| 14 | 8uL (1437.01uM)          | 0.12448    | 0.15608    | 5.9540E-2  | 3.8727E-2  |

### $\Delta$ -[Ru(bpy)<sub>2</sub>Eilatin]<sup>2+</sup> / poly r[l]-r[C]

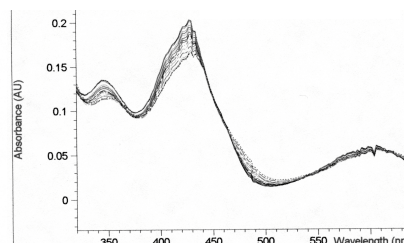

Sample/Result Table

| #  | Name                     | Abs<350nm> | Abs<420nm> | Abs<480nm> | Abs<560nm> |
|----|--------------------------|------------|------------|------------|------------|
| 1  | 8uM Delta                | 0.13307    | 0.19003    | 3.2501E-2  | 3.8284E-2  |
| 2  | 1uL, 2mM MIC (4uM)       | 0.13380    | 0.18993    | 3.3661E-2  | 3.9261E-2  |
| 3  | 2uL (12uM)               | 0.13219    | 0.18822    | 3.4149E-2  | 3.9215E-2  |
| 4  | 3uL (24uM)               | 0.12852    | 0.18416    | 3.3661E-2  | 3.8162E-2  |
| 5  | 3uL (36uM)               | 0.12694    | 0.18207    | 3.4363E-2  | 3.7872E-2  |
| 6  | 2uL, 3.95mM (51.8uM)     | 0.12625    | 0.17987    | 3.5461E-2  | 3.7933E-2  |
| 7  | 3uL (75.5uM)             | 0.12503    | 0.17719    | 3.6026E-2  | 3.7109E-2  |
| 8  | 1uL, 14.93mM (105.36 μM) | 0.12190    | 0.17455    | 3.6713E-2  | 3.6667E-2  |
| 9  | 1.5uL (150.17uM)         | 0.12161    | 0.17278    | 3.8284E-2  | 3.6697E-2  |
| 10 | 3uL (239.75uM)           | 0.11992    | 0.16931    | 3.9978E-2  | 3.5934E-2  |
| 11 | 5uL (389.05uM)           | 0.11932    | 0.16531    | 4.3777E-2  | 3.5767E-2  |
| 12 | 6uL (568.21uM)           | 0.11726    | 0.16138    | 4.5502E-2  | 3.4882E-2  |
| 13 | 6uL (747.37uM)           | 0.11458    | 0.15688    | 4.7058E-2  | 3.4607E-2  |
| 14 | 7uL (956.39uM)           | 0.11382    | 0.15477    | 4.9744E-2  | 3.5156E-2  |
| 15 | 7uL (1165.41uM)          | 0.11554    | 0.15372    | 5.2216E-2  | 3.6179E-2  |

### $\Delta$ -[Ru(bpy)<sub>2</sub>Eilatin]<sup>2+</sup> / poly r[A]

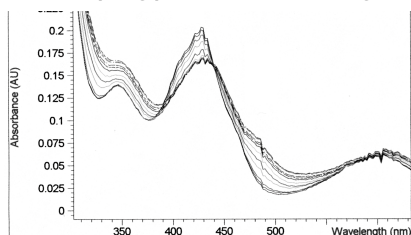

Sample/Result Table

| #  | Name                      | Abs<350nm> | Abs<420nm> | Abs<480nm> | Abs<560nm> |
|----|---------------------------|------------|------------|------------|------------|
| 1  | 8uM Lamb                  | 0.13719    | 0.19093    | 3.6331E-2  | 4.0573E-2  |
| 2  | 0.5uL, 1.1mM rA (1.1 μM)  | 0.13716    | 0.18822    | 3.9032E-2  | 4.1870E-2  |
| 3  | 1uL (3.3uM)               | 0.13693    | 0.18364    | 4.2053E-2  | 4.0710E-2  |
| 4  | 2uL (7.7uM)               | 0.14203    | 0.17773    | 5.2399E-2  | 4.2419E-2  |
| 5  | 2uL (12.1uM)              | 0.14519    | 0.16948    | 6.0486E-2  | 4.1489E-2  |
| 6  | 2uL (16.5uM)              | 0.14960    | 0.16446    | 6.8588E-2  | 4.2526E-2  |
| 7  | 2uL (20.9uM)              | 0.15509    | 0.16249    | 7.4844E-2  | 4.4128E-2  |
| 8  | 2.5uL (26.4uM)            | 0.15773    | 0.16121    | 7.7042E-2  | 4.4937E-2  |
| 9  | 1.5uL, 2.6mM (34.2 μM)    | 0.16006    | 0.16147    | 7.9208E-2  | 4.6051E-2  |
| 10 | 0.5uL, 11.02mM (45.22 μM) | 0.16412    | 0.16295    | 8.2916E-2  | 4.8370E-2  |
| 11 | 1uL (67.26uM)             | 0.16406    | 0.16118    | 8.2413E-2  | 4.7394E-2  |
| 12 | 2uL (111.34uM)            | 0.16570    | 0.16177    | 8.3878E-2  | 4.8172E-2  |

### $\Delta$ -[Ru(bpy)<sub>2</sub>Eilatin]<sup>2+</sup> / poly r[A]

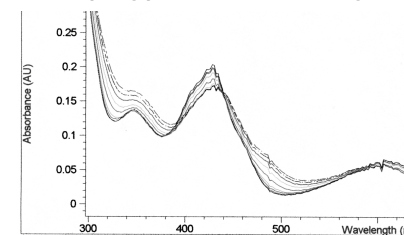

Sample/Result Table

| # | Name                     | Abs<350nm> | Abs<420nm> | Abs<490nm> | Abs<560nm> |
|---|--------------------------|------------|------------|------------|------------|
| 1 | 8uM Delta                | 0.13597    | 0.19110    | 1.8982E-2  | 3.8483E-2  |
| 2 | 0.5uL, 1.1mM rA (1.1 μM) | 0.13420    | 0.18762    | 2.0584E-2  | 3.8574E-2  |
| 3 | 0.5uL (2.2mM)            | 0.13646    | 0.18629    | 2.3590E-2  | 3.9261E-2  |
| 4 | 1uL (4.4uM)              | 0.13637    | 0.18115    | 2.7084E-2  | 3.8422E-2  |
| 5 | 2uL (8.8uM)              | 0.14043    | 0.17329    | 3.6102E-2  | 3.8483E-2  |
| 6 | 2uL (13.2uM)             | 0.14421    | 0.16721    | 4.6570E-2  | 4.0756E-2  |
| 7 | 2uL (17.6uM)             | 0.15149    | 0.16437    | 5.4733E-2  | 4.2084E-2  |
| 8 | 2.5uL (23.1uM)           | 0.15756    | 0.16420    | 6.0165E-2  | 4.3777E-2  |
| 9 | 1.5uL, 2.6mM (30.9 μM)   | 0.16306    | 0.16502    | 6.4713E-2  | 4.5277E-2  |

### $\Delta$ -[Ru(bpy)<sub>2</sub>Eilatin]<sup>2+</sup> / poly r[U]

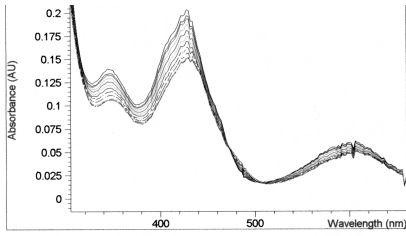

Sample/Result Table

| #  | Name                      | Abs<350nm> | Abs<420nm> | Abs<480nm> | Abs<560nm> |
|----|---------------------------|------------|------------|------------|------------|
| 1  | 8uM Lamb                  | 0.13809    | 0.19075    | 3.6346E-2  | 4.0451E-2  |
| 2  | 1u1, 1.02mM (2.04 μM)     | 0.13365    | 0.18492    | 3.7186E-2  | 4.0054E-2  |
| 3  | 0.5u1 (3.06 μM)           | 0.13184    | 0.18195    | 3.7521E-2  | 3.9246E-2  |
| 4  | 1u1 (5.1 μM)              | 0.12852    | 0.17632    | 3.8528E-2  | 3.7949E-2  |
| 5  | 1u1 (7.14 μM)             | 0.12527    | 0.17030    | 3.8940E-2  | 3.6438E-2  |
| 6  | 1u1 (9.18 μM)             | 0.12196    | 0.16458    | 3.9917E-2  | 3.5416E-2  |
| 7  | 1u1 (11.22 μM)            | 0.11818    | 0.15948    | 4.0466E-2  | 3.4058E-2  |
| 8  | 1.5u1 (14.28 μM)          | 0.11488    | 0.15353    | 4.1870E-2  | 3.2806E-2  |
| 9  | 2u1 (18.36 μM)            | 0.11162    | 0.14760    | 4.2816E-2  | 3.1601E-2  |
| 10 | 1.5u1, 2.15mM (24.3 μM)   | 0.10648    | 0.14281    | 4.3503E-2  | 3.1036E-2  |
| 11 | 2u1 (33.41 μM)            | 0.10789    | 0.14331    | 4.4891E-2  | 3.1631E-2  |
| 12 | 3u1 (66.81 μM)            | 0.10631    | 0.14268    | 4.5410E-2  | 3.1891E-2  |
| 13 | 0.5u1, 20.36mM (66.67 μM) | 0.10732    | 0.14333    | 4.5837E-2  | 3.1754E-2  |

### $\Delta$ -[Ru(bpy)<sub>2</sub>Eilatin]<sup>2+</sup> / poly r[U]

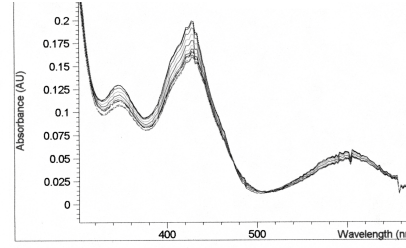

Sample/Result Table

| #  | Name                      | Abs<350nm> | Abs<420nm> | Abs<480nm> | Abs<560nm> |
|----|---------------------------|------------|------------|------------|------------|
| 1  | 8uM Delta                 | 0.12868    | 0.18596    | 2.9892E-2  | 3.6758E-2  |
| 2  | 0.5u1, 1.02mM (1.02 μM)   | 0.12865    | 0.18448    | 3.1784E-2  | 3.7659E-2  |
| 3  | 1u1 (3.06 μM)             | 0.12552    | 0.17944    | 3.3340E-2  | 3.6865E-2  |
| 4  | 1u1 (5.1 μM)              | 0.12180    | 0.17303    | 3.3646E-2  | 3.5522E-2  |
| 5  | 1u1 (7.14 μM)             | 0.11801    | 0.16727    | 3.4210E-2  | 3.4317E-2  |
| 6  | 1u1 (9.18 μM)             | 0.11543    | 0.16206    | 3.4485E-2  | 3.3035E-2  |
| 7  | 1.5u1 (12.24 μM)          | 0.11327    | 0.15837    | 3.4546E-2  | 3.2166E-2  |
| 8  | 2u1 (16.32 μM)            | 0.11160    | 0.15614    | 3.4744E-2  | 3.1616E-2  |
| 9  | 1.5u1, 2.15mM (22.77 μM)  | 0.11134    | 0.15533    | 3.5400E-2  | 3.1937E-2  |
| 10 | 2.5u1 (33.52 μM)          | 0.10759    | 0.15193    | 3.4485E-2  | 3.1250E-2  |
| 11 | 2.5u1 (44.27 μM)          | 0.10748    | 0.15140    | 3.5339E-2  | 3.1372E-2  |
| 12 | 3u1 (57.17 μM)            | 0.10727    | 0.15021    | 3.5217E-2  | 3.1250E-2  |
| 13 | 0.5u1, 20.36mM (64.63 μM) | 0.10663    | 0.14973    | 3.6316E-2  | 3.1067E-2  |

### $\Delta$ -[Ru(bpy)<sub>2</sub>Eilatin]<sup>2+</sup> / poly r[C]

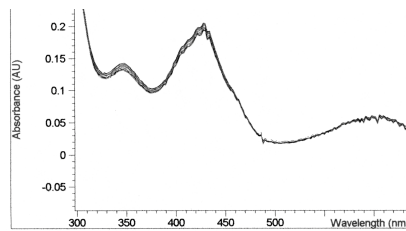

Sample/Result Table

| #  | Name                     | Abs<350nm> | Abs<420nm> | Abs<480nm> | Abs<560nm> |
|----|--------------------------|------------|------------|------------|------------|
| 1  | 8uM Lamb                 | 0.14102    | 0.19347    | 3.7308E-2  | 4.1702E-2  |
| 2  | 0.5u1, 2.5mM (2.5 μM)    | 0.13874    | 0.19272    | 3.7476E-2  | 4.2313E-2  |
| 3  | 1u1 (7.5 μM)             | 0.13788    | 0.19165    | 3.6636E-2  | 4.1489E-2  |
| 4  | 2u1 (17.5 μM)            | 0.13765    | 0.19101    | 3.6743E-2  | 4.1351E-2  |
| 5  | 3u1 (32.5 μM)            | 0.13628    | 0.19017    | 3.6530E-2  | 4.1412E-2  |
| 6  | 4u1 (52.5 μM)            | 0.13545    | 0.18910    | 3.6621E-2  | 4.1443E-2  |
| 7  | 5u1 (77.5 μM)            | 0.13380    | 0.18672    | 3.6285E-2  | 4.0955E-2  |
| 8  | 6u1 (107.5 μM)           | 0.13190    | 0.18413    | 3.5812E-2  | 4.0680E-2  |
| 9  | 7u1 (142.5 μM)           | 0.13098    | 0.18283    | 3.6392E-2  | 4.0985E-2  |
| 10 | 0.5u1, 72.9mM (215.4 μM) | 0.12946    | 0.18190    | 3.6499E-2  | 4.0985E-2  |
| 11 | 1u1 (361.2 μM)           | 0.12988    | 0.18152    | 3.6560E-2  | 4.0848E-2  |
| 12 | 1.5u1 (534.9 μM)         | 0.13092    | 0.18259    | 3.8956E-2  | 4.2969E-2  |

### $\Delta$ -[Ru(bpy)<sub>2</sub>Eilatin]<sup>2+</sup> / poly r[C]

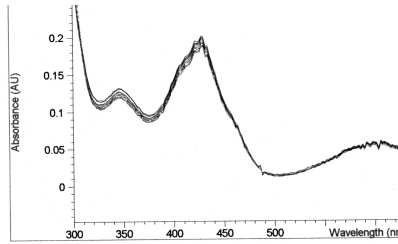

Sample/Result Table

| #  | Name                | Abs<350nm> | Abs<380nm> | Abs<420nm> | Abs<450nm> |
|----|---------------------|------------|------------|------------|------------|
| 1  | 8uM Delta           | 0.12883    | 9.6130E-2  | 0.18651    | 0.11432    |
| 2  | 1u1, 2.5mM (5uM)    | 0.13039    | 9.7595E-2  | 0.18878    | 0.11612    |
| 3  | 2u1 (15uM)          | 0.12596    | 9.4284E-2  | 0.18565    | 0.11467    |
| 4  | 2u1 (25uM)          | 0.12532    | 9.4208E-2  | 0.18594    | 0.11404    |
| 5  | 3u1 (40uM)          | 0.12434    | 9.3521E-2  | 0.18439    | 0.11371    |
| 6  | 4u1 (60uM)          | 0.12383    | 9.2712E-2  | 0.18245    | 0.11259    |
| 7  | 5u1 (85uM)          | 0.12277    | 9.1660E-2  | 0.18066    | 0.11179    |
| 8  | 6u1 (115uM)         | 0.12024    | 9.0240E-2  | 0.17871    | 0.11055    |
| 9  | 7u1 (150uM)         | 0.11884    | 8.9493E-2  | 0.17630    | 0.10881    |
| 10 | 0.5u1, 72.9mM (222) | 0.11876    | 8.8882E-2  | 0.17577    | 0.10869    |
| 11 | 1u1 (368.7uM)       | 0.11717    | 8.7952E-2  | 0.17444    | 0.10786    |
| 12 | 1.5u1 (514.5uM)     | 0.11703    | 8.8089E-2  | 0.17381    | 0.10847    |
| 13 | 2u1 (660.3uM)       | 0.11810    | 8.8913E-2  | 0.17374    | 0.10858    |

### $\Delta$ -[Ru(bpy)<sub>2</sub>Eilatin]<sup>2+</sup> / poly r[G]

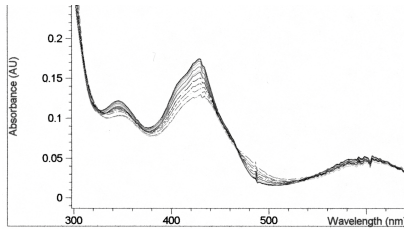

Sample/Result Table

| #  | Name                     | Abs<350nm> | Abs<420nm> | Abs<490nm> | Abs<560nm> |
|----|--------------------------|------------|------------|------------|------------|
| 1  | 8uM Lamb                 | 0.11906    | 0.16434    | 1.9669E-2  | 3.6377E-2  |
| 2  | 0.5u1, 0.374mM (0.37 μM) | 0.11900    | 0.16368    | 2.0493E-2  | 3.6972E-2  |
| 3  | 1u1 (1.12 μM)            | 0.11714    | 0.16165    | 1.9989E-2  | 3.6407E-2  |
| 4  | 2u1 (2.62 μM)            | 0.11568    | 0.15886    | 2.0477E-2  | 3.6011E-2  |
| 5  | 3u1 (4.86 μM)            | 0.11349    | 0.15515    | 2.0554E-2  | 3.4775E-2  |
| 6  | 4u1 (7.85 μM)            | 0.11169    | 0.15065    | 2.2125E-2  | 3.4515E-2  |
| 7  | 0.5u1, 3.74mM (11.1)     | 0.11229    | 0.14879    | 2.4551E-2  | 3.4958E-2  |
| 8  | 1u1 (19.07 μM)           | 0.11086    | 0.14253    | 2.7039E-2  | 3.3661E-2  |
| 9  | 1.5u1 (30.29 μM)         | 0.10982    | 0.13686    | 3.0792E-2  | 3.3676E-2  |
| 10 | 2u1 (45.25 μM)           | 0.10774    | 0.13107    | 3.3264E-2  | 3.2806E-2  |
| 11 | 3u1 (67.69 μM)           | 0.10280    | 0.12422    | 3.3401E-2  | 3.1021E-2  |
| 12 | 0.5u1, 37.4mM (105 μM)   | 0.10373    | 0.12434    | 3.7460E-2  | 3.4317E-2  |

### $\Delta$ -[Ru(bpy)<sub>2</sub>Eilatin]<sup>2+</sup> / poly r[G]

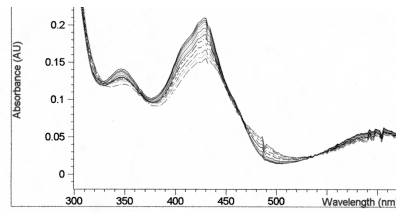

Sample/Result Table

| #  | Name                     | Abs<350nm> | Abs<420nm> | Abs<490nm> | Abs<560nm> |
|----|--------------------------|------------|------------|------------|------------|
| 1  | 8uM Delta                | 0.13914    | 0.19736    | 1.9531E-2  | 4.1153E-2  |
| 2  | 0.5u1, 0.374mM (0.37 μM) | 0.13722    | 0.19498    | 1.9714E-2  | 4.0939E-2  |
| 3  | 1u1 (1.12 μM)            | 0.13557    | 0.19255    | 1.9292E-2  | 4.0634E-2  |
| 4  | 2u1 (2.62 μM)            | 0.13356    | 0.18922    | 2.0325E-2  | 4.0054E-2  |
| 5  | 3u1 (4.86 μM)            | 0.13147    | 0.18518    | 2.1225E-2  | 3.9444E-2  |
| 6  | 4u1 (7.85 μM)            | 0.12965    | 0.18076    | 2.3010E-2  | 3.9124E-2  |
| 7  | 0.5u1, 3.74mM (11.1 μM)  | 0.12883    | 0.17722    | 2.4902E-2  | 3.8788E-2  |
| 8  | 1u1 (19.07 μM)           | 0.12874    | 0.17242    | 2.9144E-2  | 3.8971E-2  |
| 9  | 1.5u1 (30.29 μM)         | 0.12785    | 0.16599    | 3.325E-2   | 3.8300E-2  |
| 10 | 2u1 (45.25 μM)           | 0.12660    | 0.15939    | 3.7460E-2  | 3.7811E-2  |
| 11 | 3u1 (67.69 μM)           | 0.12480    | 0.15404    | 3.9978E-2  | 3.7415E-2  |
| 12 | 0.5u1 (105.12 μM)        | 0.12068    | 0.14850    | 4.1107E-2  | 3.6438E-2  |
